# **A primary sexual trait involved in courtship in insects: Male genital lobe morphology affects the chance to copulate in *Drosophila pachea***

Bénédicte M. Lefèvre<sup>1</sup>, Diane Catté<sup>1</sup>, Virginie Courtier-Orgogozo<sup>1</sup>, Michael Lang<sup>1</sup>

<sup>1</sup>Team “Evolution and Genetics”, Institut Jacques Monod, CNRS, UMR7592, Université de Paris, 15 rue Hélène Brion, 75013 Paris

\*corresponding author: michael.lang@ijm.fr

## **Abstract**

Male genitalia are thought to ensure transfer of sperm through direct physical contact with female during copulation. Such primary sexual traits were also observed to affect pre-copulatory female mate-choice in some Vertebrates species, but whether this also occurs in insects is unknown. Males of the fruitfly *Drosophila pachea* have a pair of asymmetric external genital lobes, which are primary sexual structures and stabilize the copulatory complex of female and male genitalia. We tested for a pre-copulatory courtship role of these lobes with a *D. pachea* stock where males have variable lobe lengths. In 111 mate competition experiments with a single female and two males, females preferentially engaged into a first copulation with males that had a longer left lobe. Courtship durations increased with female age and when two males courted the female simultaneously, compared to experiments with only one courting male. In 54 additional experiments with both males having partially amputated left lobes, we observed a similar but weaker effect of left lobe length on copulation success. We conclude that left lobe length affects male mating success before genital contact. Our results suggest that primary male sexual traits in insects can serve as a signal for pre-copulatory mate-choice.

keywords: *Drosophila pachea*, primary sexual trait, mating behaviour, mate-competition experiments, genitalia

## 24 **Introduction**

25 Males and females exhibit different reproduction strategies due to a higher limitation of  
 26 larger female gametes compared to smaller and abundant male gametes (Bateman 1948). This  
 27 implies male-male intrasexual mate-competition for siring the limited female gametes. In turn,  
 28 females may optimize reproduction by choosing males that confer survival and fecundity benefits to  
 29 her and to the offspring. This dynamics has been formalized into genetic models (Fisher 1930;  
 30 Lande 1981) involving female preferences for particular male characters and male mate  
 31 competition, and can contribute to the rapid evolution of female preferences and male sexual  
 32 attributes.

33 Across animals with internal fertilization, genitalia are usually the most rapidly evolving  
 34 organs (Eberhard 1985). Several hypotheses propose that the evolution of genitalia is based on  
 35 sexual selection at different levels of reproduction, including competition of sperm from different  
 36 males inside the female (sperm competition) (Birkhead and Pizzari 2002), female controlled storage  
 37 and usage of sperm to fertilize eggs (cryptic female choice) (Thornhill 1983; Eberhard 1985, 2010),  
 38 or due to a sexually antagonistic conflict between male and female over such fertilization decisions  
 39 (Arnqvist 1998; Chapman et al. 2003). Male courtship is well known as a behaviour to attract  
 40 females before copulation begins, but has also been reported to occur during or even after  
 41 copulation (Eberhard 1991, 1994). It is thought to be a widespread and key aspect of copulation in  
 42 the cryptic female choice scenario for stimulation of the female to utilize the male's sperm  
 43 (Thornhill 1983; Eberhard 1985). A variety of insect species were reported where males had  
 44 evolved elaborated male genital structures that are used during copulatory courtship to stimulate the  
 45 female through tapping or other physical stimuli (Eberhard 1991, 1994).

46 Traditionally, genitalia are categorized as primary and secondary sexual characters. Genital  
 47 structures are considered “primary” when they are directly used for the transfer of gametes during  
 48 copulation or when they contribute to the complexing of female and male copulatory organs

(Eberhard 1985). Other traits that differ between sexes and that are linked to reproduction are considered “secondary” sexual traits. Secondary sexual traits can be involved in pre-copulatory mate-choice via long range signalling. Pre-copulatory mate-choice signals can be visual, for example in birds through discrimination of feather length, colouration or specific plumage ornaments (Andersson 1982; von Schantz et al. 1989; Hill 1991; Norris 1993; Petrie 1994), auditory through animal courtship songs (Hasselquist et al. 1996; Welch et al. 1998) or olfactory through pheromone release, for example in insects (Birch 1970; Sreng 1993). In some cases, secondary sexual traits were found to correlate with so-called “direct” female benefits on fecundity, parental care, or female survival (Møller and Jennions 2001). In other cases, they were “indirectly” related to genetic quality of male gametes and survival of the progeny (von Schantz et al. 1989; Hill 1991; Norris 1993; Petrie 1994; Hasselquist et al. 1996; Welch et al. 1998; Møller and Jennions 2001). As a result, secondary sexual traits are thought to evolve rapidly due to sexual selection associated with pre-copulatory events.

For primary sexual traits, sexual selection is thought to act mainly during copulation through direct physical contacts of female and male genitalia (Eberhard 1985, 1994). However, primary genitalia could also be possibly involved in pre-copulatory mate choice. Supposing that a particular male genital trait-variance enhances or favours female fecundity, it might become preferred by the female during pre-copulatory courtship. This preference could rely on direct benefits to reduce energy investment or predation risk caused by unsuccessful copulation attempts, or on indirect male genetic quality to be inherited into the offspring generation. A few examples of primary genitalia used in pre-copulatory courtship are known in vertebrates: male genital displays are reported in certain primates (Ploog and MacLean 1963; Wickler 1966) and in lizards (Bohme 1983). Furthermore, females of some live-bearing fish species were reported to prefer to mate with males with large gonopodia (Langerhans et al. 2005; Kahn et al. 2010). These cases involve visual stimuli and large male genital organs. In invertebrates, which usually harbour smaller genital

organs, no case of primary sexual trait influencing reproduction before copulation has been reported to our knowledge. Nevertheless, pedipalp drumming of the male wolf spider *Lycosa rabida* has a communicative function in courtship (Rovner 1967). The pedipalps are modified legs that serve as sensory appendages and are highly modified in males for an intromittent function to transfer the spermatophore to the female (Robinson 1982). In this sense, pedipalps can be regarded as primary sexual traits, although they are “secondary genitalia” in terms of their appendage homology. In some insect courtship descriptions, males were reported to present their distal abdomen to the female, such as abdominal flexion displays in praying mantid species (Quesnel 1967; Liske and Davis 1984, 1987), genitalia curling in the moth *Phlogophora meticulosa* (Birch 1970) or abdomen curving in the cockroach *Oxyhaloa deusta* (Lizée et al. 2017). In the latter two examples, such abdomen postures were associated with male pheromone release, but it is not clear whether these particular primary sexual traits influence mating success.

The *Drosophila nannoptera* species group is a promising model to study the evolution of primary sexual traits, especially with respect to the evolution of left-right asymmetry. Distinct directional left-right asymmetries and one-sided mating positions evolved repeatedly in the four described species of this group (Lang et al. 2014; Acurio et al. 2019). Male *D. pachea* have an asymmetric aedeagus (intromission organ) and a pair of asymmetric external lobes with the left lobe being approximately 1.5 times longer than the right lobe (Pitnick and Heed 1994; Lang and Orgogozo 2012; Acurio et al. 2019) (Figure 1), *D. acanthoptera* has an asymmetric aedeagus (Vilela and Bächli 1990; Acurio et al. 2019) and *D. wassermani* has a pair of asymmetric anal plates (cerci) (Pitnick and Heed 1994). In contrast, no asymmetries have been described for the fourth species *D. nannoptera* (Vilela and Bächli 1990; Acurio et al. 2019). These particular genital traits have likely evolved during the past 3-6 Ma (Lang et al. 2014). *D. pachea* and *D. nannoptera* both mate in a right-sided copulation position (Acurio et al. 2019). *D. pachea* males rest on top of the female abdomen with the antero-posterior midline shifted about 6-8 degrees to the right side of the

99 female midline (Lang and Orgogozo 2012; Rhebergen et al. 2016), while *D. nanoptera* tilts down  
 100 the females right abdomen (Acurio et al. 2019). In *D. pachea*, male and female genitalia form an  
 101 asymmetric complex during copulation and the asymmetric lobes stabilize this genital complex  
 102 (Rhebergen et al. 2016). Furthermore, *D. pachea* and *D. nanoptera* are among the *Drosophila*  
 103 species that produce the longest (giant) sperm (Pitnick et al. 1995, 1999), and their ejaculates  
 104 contain in average about 40 and 80 sperm cells, respectively (Pitnick and Markow 1994). Thus, a  
 105 particular right-sided mating position could potentially be associated with optimal transfer of giant  
 106 sperm during copulation (Acurio et al. 2019).

107         The aim of this study was to test if the asymmetric genital lobes of *D. pachea* would have an  
 108 effect on pre-copulatory mate-choice, in addition to their copulatory role in stabilizing the complex  
 109 of male and female genitalia. Previously, we found that males originating from one of our *D.*  
 110 *pachea* laboratory stocks possess short and rather symmetric lobes (Lang and Orgogozo  
 111 2012) (Figure 1), while others have the typical size asymmetry. This variable development,  
 112 especially affecting the left genital lobe within the same fly stock enabled us to test if lobe length  
 113 might have an effect on pre-copulatory courtship or mate competition. We selected *D. pachea* males  
 114 with short left lobes and produced a stock with an increased variance of left lobe length. Next, we  
 115 tested sibling males of this selection stock in mate-competition assays for their success to engage  
 116 first into copulation with a single female. We also tested whether lobe length or copulation success  
 117 in our assay would be affected by male courtship vigour and if lobe length affects sperm allocation  
 118 into female storage organs. Finally, we surgically shortened the length of the left lobe in males that  
 119 had developed long left lobes, to further test whether left lobe length affects copulation success.

## 120 **Material and Methods**

### 121 **Fly stock establishment and maintenance**

122 Two *D. patchea* stocks 15090-1698.01 and 15090-1698.02 were retrieved from the  
 123 Drosophila Species Stock Center. Flies were maintained in 25 x 95 mm plastic vials containing 10  
 124 mL of standard Drosophila medium (60 g/L brewer's yeast, 66.6 g/L cornmeal, 8.6 g/L agar, 5 g/L  
 125 methyl-4-hydroxybenzoate and 2.5% v/v ethanol) and a ~ 10 x 50 mm piece of bench protection  
 126 sheet (Bench guard). As *D. patchea* requires 7-dehydrocholesterol for proper development (Heed  
 127 and Kircher 1965; Warren et al. 2001; Lang et al. 2012), we mixed the medium of each vial with 40  
 128 µL of 5 mg/mL 7-dehydrocholesterol, dissolved in ethanol (standard *D. patchea* food). Flies were  
 129 kept at 25°C inside incubators (Velp) with a self-made light installation for a 12 h light: 12h dark  
 130 photo-periodic cycle combined with a 30-min linear illumination change between light (1080  
 131 lumen) and dark (0 lumen). We used males of stock 15090-1698.02 to generate a new stock with  
 132 increased proportions of males with the lobe length aberrant phenotype. For this, we chose 3 males  
 133 with apparently symmetric (aberrant) genital lobes and crossed them with 3-4 sibling virgin  
 134 females. We repeated the selection with the progeny for a total of 36 generations. Then, we removed  
 135 males with clearly visible asymmetric (wild-type) lobes from the progeny for another 14  
 136 generations to derive the final stock (selection stock).

### 137 **Virgin fly selection**

138 Virgin flies at 0-1 d after emerging from the pupa were CO<sub>2</sub> anaesthetised on a CO<sub>2</sub>-pad  
 139 (INJECT+MATIC Sleeper) under a stereo-microscope Stemi 2000 (Zeiss), separated according to  
 140 sex and maintained in groups of 20-30 individuals. Males and females were raised until reaching

141 sexual maturity, about 14 days for males and 4 days for females at 25° C (Pitnick 1993). This  
142 allowed us to use virgin individuals in each mating experiment. Males were anaesthetised on the  
143 CO<sub>2</sub> pad (see above), sorted according to lobe morphology (asymmetric and symmetric lobes) and  
144 isolated into single vials at least two days before each mating experiment took place.

## 145 **Mate-competition assay**

146 Two *D. pachea* males and a single *D. pachea* female were put together into a white,  
147 cylindrical mating cell (Additional datafile 1: Figure S1) with a diameter of 20 mm, a depth of 4  
148 mm and a transparent 1 mm Plexiglas top-cover. Optionally, mating cells were concave with a  
149 diameter of 20 mm and a depth of 4 mm at the center (Additional datafile 2: experiments 1-16).  
150 Flies were transferred without CO<sub>2</sub> anaesthesia using a fly aspirator: a 7 mm diameter silicone tube  
151 closed at the tip with cotton and a 1000 µL wide bore (3 mm) micro-tip. Males were CO<sub>2</sub>  
152 anaesthetised under a binocular to visually select two males of the selection stock that differed in  
153 lobe length (Additional datafile 1: Figure S2). This selection was done to increase the average  
154 pairwise difference of lobe lengths between the two males. Movie recordings were started as soon  
155 as the chamber was immediately put under the camera (see below).

156 All mating experiments were carried out inside a temperature and humidity controlled  
157 climate chamber at 25° C ± 0.1° C and 80% ± 5% or 60% ± 5% (experiments 1-15) humidity. We  
158 used digital cameras MIRAZOOM MZ902 (OWL) or DigiMicro Profi (DNT) to record copulation  
159 and courtship behaviour. The MIRAZOOM MZ902 (OWL) camera was mounted on a modified  
160 microscope stand (191348, Conrad) equipped with a 8-cm LED white light illumination ring (EB-  
161 AE-COB-Cover, YM E-Bright) and a platform to hold four individual cylindrical mating cells  
162 (Additional datafile 1: Figure S1). Experiment 16 was filmed with the OWL camera and a concave  
163 shaped mating cell that was put on a flat plastic cover on top of the microscope stand. For  
164 experiments 1-15, we used concave shaped mating cells that were put onto the stand of the

165 DigiMicro Profi (DNT) camera. Data was acquired with the programs Cheese (version 3.18.1)  
 166 (<https://wiki.gnome.org/Apps/Cheese>) or GUVVIEW (version 0.9.9) GTK UVC (experiments 1-  
 167 15) on an ubuntu linux operating system in webm or mkv format. Up to four experiments were  
 168 recorded in a single movie, which was split after recording and converted into mp4 format with  
 169 Avidemux 2.6 (<http://www.avidemux.org/>) to obtain a single movie per experiment.

170 We waited for a copulation to take place between one of the males and the female (see  
 171 below). The mating cell was shortly recovered from the climate chamber at about 5-10 min after  
 172 copulation start and the non-copulating male (male 1) was removed from the cell with an aspirator  
 173 and transferred into a 2-mL reaction tube filled with 70% ethanol. The copulating male (male 2) and  
 174 the female were removed from the mating cell after copulation had ended and were also isolated  
 175 into single 2-mL reaction tubes filled with 70% ethanol. Optionally, the female was kept alive for  
 176 12-24 h in a vial containing 5-10 mL grape juice agar (24 gr/L agar, 26 gr/L sucrose, 120 mg/L  
 177 Tegosept, 20%  $\nu$  grape juice, and 1.5%  $\nu$  ethanol). The presence of eggs on the plate was  
 178 systematically checked but never observed. Females were finally sacrificed to prepare  
 179 spermathecae.

180 Our aim was to observe at least 50 experiments, where both males courted the female  
 181 simultaneously and where copulation was observed. In total, we carried out 98 and 89 experiments  
 182 with females of stocks 15090-1698.01 and 15090-1698.02, respectively (Additional datafile 1:  
 183 Table S1). We removed 31 experiments from the analysis because either copulation was not  
 184 observed until 1 h after the experiment started (20 experiments), flies escaped, got injured or died  
 185 inside the mating cell (4 experiments) or the dissections of male genitalia failed (11 experiments,  
 186 see below, Additional datafile 1: Table S1). We observed that copulation ended upon removal of the  
 187 non-copulating male in 3 / 76 experiments with females of stock 15090-1698.01 and in 4 / 76  
 188 copulations with females of stock 15090-1698.02. However, these experiments were included into  
 189 data analysis for evaluation of the males to engage into a copulation. In total, we thus analysed 76



190 and 76 experiments with females of stocks 15090-1698.01 and 15090-1698.02, respectively  
191 (Additional file 1: Table S1).

## 192 **Analysis of courtship and copulation behaviour**

193 Videos were analysed with the OpenShot Video Editor software, version 1.4.3  
194 (<https://www.openshot.org>) to annotate the relative timing of courtship and copulation in our  
195 experiments (Additional datafile 1: Figure S3). Data was manually entered into spreadsheets. We  
196 annotated the beginning of male courtship as the start of at least three consecutive male courtship  
197 behaviours according to Spieth (1952) (Spieth 1952), such as male touching the female abdomen  
198 with the forelegs, wing vibration, male following the female, and male touching the female  
199 ovipositor or ground next to it with the proboscis (mouth parts). The beginning of copulation was  
200 recorded as the moment when the male mounted the female abdomen. However, we only scored a  
201 copulation start if the male remained mounted for at least 15 sec. The end of copulation was  
202 considered as the moment when male and female genitalia were separated and the male had  
203 completely descended with the forelegs from the female abdomen. Male “licking” behaviour was  
204 estimated as the periods that one male spent with the head being close to the female ovipositor and  
205 intimately following it, which was often accompanied by the male proboscis (mouth-parts) touching  
206 the female oviscapit or the bottom of the mating cell next to it. In particular, licking behaviour was  
207 quantified in 104/111 experiments where both males courted the female simultaneously. We  
208 excluded 7 movies from the analysis because the males changed positions very fast so that they  
209 could not be unambiguously distinguished.

210 Movie-recording failed during copulation of 4 / 76 experiments with females of stock  
211 15090-1698.02 and corresponding experiments were excluded from copulation duration analysis.  
212 We also observed that copulation ended prematurely upon male 1 removal in 7 / 152 experiments  
213 and included them into estimation of copulation duration. We found average copulation durations of

214 31.93 ± 7.96 min ( $N = 76$ , mean ± standard deviation (sd)) with females of stock 15090-1698.01  
 215 and 27.05 ± 7.59 min ( $N = 72$ , mean ± standard deviation) with females of stock 15090-1698.02,  
 216 which were comparable to previous analyses of *D. pachea* copulation durations (Jefferson 1977;  
 217 Pitnick and Markow 1994; Lang and Orgogozo 2012; Rhebergen et al. 2016). Thus, the removal of  
 218 the non-copulating male sporadically affected copulation, but this had no significant effect on mean  
 219 copulation durations.

220       Statistic analyses was performed with R version 3.6 (R Core Team 2014). Generalized linear  
 221 model fits and logistic regression were calculated with the function glm and the gaussian(identity)  
 222 and binomial(logit) link functions, respectively. Confidence intervals were estimated based on  
 223 generalized linear models with the function confint.

## 224 **Dissections**

225       Adults were dissected in water with forceps (Forceps Dumont #5, Fine Science Tool) inside  
 226 a transparent 25 mm round dissection dish under a stereo-microscope (Zeiss Stemi 2000). Male  
 227 genitalia were isolated by piercing the abdomen with the forceps between the genital arch and the  
 228 A6 abdominal segment and thereby separating the genitalia from the abdomen. We also mounted  
 229 the left anterior leg of each dissected male in glycerol. Female spermatheca were recovered after  
 230 opening the ventral abdomen with forceps and removal of the gut and ovaries. The spermathecae  
 231 were isolated and separated according to left and right sides and immediately examined using a  
 232 microscope (see below). All dissected tissues were stored in 200 µL storage solution  
 233 (glycerol:acetate:ethanol, 1:1:3) at 4° C.

234       For imaging, male genitalia were transferred into a dissection dish filled with pure glycerol  
 235 and examined with a VHX2000 (Keyence) microscope equipped with a 100-1000x VH-Z100W  
 236 (Keyence) zoom objective at 300-400 fold magnification. Genitalia were oriented to be visible in  
 237 posterior view. The left and right lateral spines, as well as the dorsal edge of the genital arch were

aligned to be visible in the same focal plane. In some preparations, the genital arch broke and lobes were aligned without adjusting the position of the dorsal genital arch. The experiment was discarded from analysis in cases where lobes could not be aligned. Male lobe lengths were measured on acquired images as the distance between the base of each lateral spine and the tip of each lobe (Figure 1C,D) using ImageJ version 1.50d (<https://imagej.nih.gov/ij>). Male legs were put on a flat glycerol surface with the inner side of the tibia facing to the camera. Legs were imaged at 200 fold magnification with the VHX 2000 microscope (Keyence) as described above. Female spermathecae were arranged on the bottom of the transparent plastic dissection dish, filled with water. Images were acquired using transmission light in lateral view with the Keyence VHX2000 microscope at 400-500 fold magnification. Sperm was directly visible inside the transparent spermathecae. Sperm filling levels were annotated for each spermatheca separately to match three different categories: 0, 1/6 or 1/3 of its total volume. Then, the average filling level for both spermathecae was calculated for each female.

## Epandrial lobe surgery

Epandrial lobe surgery was done on 5-6 day-old *D. patchea* adult males of the selection stock following Rhebergen et al. (2016). Males were anaesthetised on a CO<sub>2</sub> pad (see above) and then further immobilized with a small copper wire, which was slightly pressed onto the male abdomen. The left epandrial lobe was shortened to various lengths with micro dissection scissors (SuperFine Vannas Scissors, World Precision Instruments). Flies were let to recover for at least 7 days on standard *D. patchea* food at 25° C in groups. No mortality difference was observed between males that underwent lobe surgery and non-treated males, similar to what was observed by Rhebergen et al. (2016).

## 260 **Results**

### 261 **Genital lobe lengths differ between *D. patchea* stocks**

262         In our laboratory stock 15090-1698.01, *D. patchea* males display a characteristic left-right  
 263 size asymmetry of genital lobes with the left lobe being consistently larger than the right lobe  
 264 (Figure 1A,C, Figure 2 A, Table 1, Additional datafile 3). Similarly, in stock 15090-1698.02, most  
 265 males reveal a larger left lobes, but a few individuals are observed with particularly small lobes that  
 266 are rather symmetric in length (Figure 1b-d, Figure 2b). To create a stock containing a larger  
 267 proportion of males with shorter left lobes, we selected 3 males of stock 15090-1698.02 with  
 268 particularly short left lobes (Lang and Orgogozo 2012) and crossed them with 3-4 sibling virgin  
 269 females. We repeated this selection in the offspring generation for a total of 36 generations  
 270 (equivalent to approximately three years). Then, we changed the selection procedure and just  
 271 removed males that had the typical lobe asymmetric lobe length ratio for another 12 generations  
 272 (Material and Methods). In the final stock (selection stock) we observed an increased variance of  
 273 left lobe length compared to the source stock 15090-1698.02 (Levene's test: selection stock /  
 274 15090-1698.02:  $df1=1$ ,  $df2=147$ ,  $F=11.506$ ,  $p=0.0008913$ ) (Figure 2C, Additional datafile 3). In  
 275 contrast, the right lobe length differed only marginally among stocks (Table 1) and the variances of  
 276 right lobe lengths were not significantly different (Levene's test,  $df1=2$ ,  $df2=196$ ,  $F=0.8684$ ,  
 277  $p=0.4212$ ).

### 278 **Females tend to copulate first with males with longer lobes**

279         To test whether lobe size might affects male mating success before copulation, we set-up a  
 280 mate competition assay. We introduced a single female of wild-type stock 15090-1698.01 or 15090-  
 281 1698.02 and two sibling males of the selection stock that visually differed in lobe length when  
 282 inspected with a binocular microscope (Material and Methods) (Additional datafile 1: Figures S1  
 283 and S2, Additional datafile 2). Then, we video-recorded their behaviour. Once a copulation was

284 observed, the male that did not copulate was removed from the chamber about 5-10 min after  
 285 copulation start with the other male. Both males courted the female simultaneously in the majority  
 286 of experiments (111/152) (Additional datafile 1: Table S1), while courtship of a single male was  
 287 observed to a lesser extend (41/152). No courtship was identified in 4 experiments (all with females  
 288 of stock 15090-1698.01). In experiments where both males courted simultaneously, females  
 289 engaged into a copulation more often with the male that had a longer left lobe (binomial test,  $N$   
 290  $=111$ ,  $P = 0.00224$ ) and left lobe length was positively associated with copulation success in  
 291 experiments with females of stock 15090-1698.01 and stock 165090-1698.02 (Table 2), while right  
 292 lobe length was not associated. To test for potential effect of body size, we measured the length of  
 293 the left foreleg tibia in all males. Left lobe length tended to be loosely but not significantly  
 294 associated with tibia length (GLM: left lobe length  $\sim$  tibia length: DF 1/205,  $F = 3.2241$ ,  $P =$   
 295  $0.07403$ ). We found that females did not preferentially engage into copulation with the males  
 296 displaying the smaller or larger tibia (binomial test,  $N=103$ ,  $P = 0.8727273$ ).

## 297 **Courtship activity affects copulation success**

298       Regardless of the stock for the female used in our experiments, courtship durations appeared  
 299 to be longer when both males courted the female simultaneously compared to experiments where  
 300 only one male courted (Mann-Whitney-Wilcoxon tests, females 15090-1698.01,  $W = 385$ ,  $N =$   
 301  $25/51$ ,  $P = 0.0053$ ; females 15090-1698.02,  $W = 219$ ,  $N = 16/60$ ,  $P = 0.0009$ ) (Figure 3A). We also  
 302 observed that courtship duration was strikingly increased in females that were older than 11 days  
 303 (after emerging from the pupa) compared to younger females (Additional datafile 1: Figure S4)  
 304 (GLM, Courtship duration  $\sim$  female age ( $<12$  days/older):  $t_1 = 4.614$ ,  $P = 0.0000108$ ). We further  
 305 examined experiments where both males courted the female simultaneously and tested whether  
 306 courtship intensity or vigour of each male would correlate with the chance to copulate first with the  
 307 female (male copulation success). For this, we estimated the contribution to courtship of either male

in experiments by quantifying one particular male courtship behaviour: we counted the frequency and duration of each male being closely following and/or touching the female ovipositor with the proboscis (mouth-parts), a behaviour denoted as “licking” (Spieth 1952) (Additional datafile 4). This measurement also enabled us to evaluate if one male might systematically be close to the female abdomen and potentially block physical contact between the other courting male and the female. In 104 analysed experiments, licking behaviour was observed throughout *D. pachea* courtship from shortly after courtship start (Materials and Methods) to the start of copulation (Additional datafile 1: Figure S3). Both males reached at least once the licking position in all experiments, with a median of 9 and a range of 2-71 times. This indicates that the female had physical contact with the proboscis of both males before copulation started (Additional datafile 1: Figure S3). We calculated a licking index for each male as the ratio of the total licking duration of the male over total courtship duration of both males (Additional datafile 1: Figure S3) to compare the relative courtship activity of both males in each experiment. The copulating male revealed a higher licking index than the non-copulating male (Figure 3b) and male copulation success was significantly affected by the licking index (GLM logistic regression, females of both stocks,  $\chi^2_{1,206}$  Deviance = 21.02/282.73,  $P = 0.000004538$ ) (Table 3), indicating that courtship vigour positively affects the chance of a male to engage first into copulation. Licking index was not significantly affected by lobe length (GLM, Courtship Index  $\sim$  lobe length; left:  $t_1 = 1.138$ ,  $P = 0.25650$ , right:  $t_1 = -0.458$ ,  $P = 0.64772$ ), nor by male tibia length (GLM, licking index  $\sim$  tibia length:  $t_1 = 1.380$ ,  $P = 0.169$ ). Altogether, our results suggest that male body size does not affect courtship vigour and that genital lobe length and courtship activity independently affect the chance of a male to copulate.

### **Lobe length does not affect sperm amount in female sperm storage organs**

To test whether lobe length influences the amount of sperm deposited into the female after copulation, we dissected a random subset of females from experiments where copulation occurred.

332 We prepared the female paired sperm storage organs (spermathecae) at 12 h - 24 h after copulation  
 333 (54 females from stock 15090-1698.01 and 25 females from stock 15090-1698.02, additional file 2)  
 334 and examined the presence of sperm. *D. pachea* has giant sperm (Pitnick and Markow 1994), which  
 335 makes direct sperm counts difficult. Therefore, we determined an apparent average spermathecae  
 336 filling level per female based on visual inspection, similar to Jefferson (1977) (Jefferson  
 337 1977) (Material and Methods). Neither right lobe length, left lobe length, sum licking duration,  
 338 copulation duration, female age (days after emerging from the pupa) significantly affected sperm  
 339 content in the spermathecae (Table 4). However, male adult age had a strong negative effect.  
 340 Copulating males with an age lower or equal to the median adult age of 16 d revealed a higher  
 341 female post-copulatory spermathecae filling level (median: 0.250, CI: 0.22-0.28,  $N = 42$ ) compared  
 342 to older males (median: 0.167, CI: 0.11-0.17,  $N = 37$ ) (GLM,  $t_1=4.989$ ,  $P = 0.00000367$ ). Given that  
 343 *D. pachea* males become fertile about 13 d after emerging from the pupa (Pitnick 1993), our results  
 344 indicate an optimal period of male ejaculate mass at the beginning of their reproductive period.  
 345 With our sample size of 79 inseminated females, we did not detect a significant effect of lobe length  
 346 on the amount of ejaculate transfer into the female (Table 4).

#### 347 **After partial amputation left lobe length still affects male copulation success**

348 Other, undetected characters might co-vary with left lobe length and could possibly account  
 349 for the higher success of males with longer lobes. To test this, we artificially shortened the left lobes  
 350 of two sibling males of the selection stock that had developed long left lobes. Males were  
 351 anaesthetised and selected by visual inspection of their genitalia using a stereomicroscope in order  
 352 to keep the specimen alive. Partially amputated lobes ranged in length from lacking at least their  
 353 most distal tip to more reduced stumps whose length approximated the corresponding right lobe. We  
 354 shortened the left lobes of both males by making wounds and amputation sections of similar sizes in  
 355 order to be able to neglect possible effects of the caused wound on the male's chance to achieve a

356 copulation. Both amputated males also lacked the bristles on most distal tip of the left lobe, which  
 357 may be involved in male courtship or copulation performance. We introduced two left-lobe-  
 358 manipulated males with a virgin female of stock 15090-1698.01 and monitored them as in the  
 359 previous assay. Similar to experiments with unmodified males, we found that left lobe length was  
 360 associated with copulation success in a logistic regression analysis, although the effect was weaker  
 361 (54 experiments, Table 2). Our results indicate that the left lobe length also increases the chance of  
 362 *D. patchea* males to copulate with a female when left lobes have been partially amputated.

## 363 **Discussion**

### 364 **Left lobe length affects the chance of a male to copulate**

365 We observed a tendency of females to copulate first with the male that had the longer left  
 366 lobe when two males courted simultaneously in our experiments. These results suggest that a long  
 367 left lobe might not only stabilize an asymmetric genital complex during copulation (Rhebergen et  
 368 al. 2016), but also increases the chance of a male to copulate first. Other factors, unrelated to lobe  
 369 length, can also bias copulation. For example, females might prefer to copulate with males of larger  
 370 body size. We found that left lobe length was slightly but not significantly correlated with tibia  
 371 length, an approximation for overall body size. However, the chance for a male to engage into  
 372 copulation was not dependent on the pairwise tibia size difference of the two males added to each  
 373 experiment. The mutation(s) associated with lobe length variation in this stock are unknown. It is  
 374 possible that one or several alleles associated with lobe length still segregate in this stock, even after  
 375 50 generations of inbreeding. If such segregating mutations have pleiotropic effects on other  
 376 inconspicuous male characters (morphological, physiological or behavioural), these traits are  
 377 expected to covary together with lobe length and the effect of lobe length that we detected might  
 378 actually be due to other co-varying factors. In experiments with artificially introduced lobe length



variation (through surgery), males were taken from the selection stock but had the expected wild-type lobe asymmetry. Left lobe length difference was then randomly and artificially introduced in those males, so that the length difference would not be expected to co-vary with the relative phenotypic expression of the supposed underlying mutation. In such experiments, we still observed an effect of lobe length on copulation success in our logistic regression analysis, although the effect was less pronounced. Thus, we conclude that the length of the left lobe appears to affect copulation success directly, and not through the collateral effect of a hypothetical pleiotropic mutation affecting both lobe length and another trait.

Some examples of asymmetric male sexual characters are known, such as asymmetric claws of fiddler crabs (*Uca*), where males use the claws during courtship to attract females with a waving movement (Perez et al. n.d.; Oliveira and Custódio 1998; Jordão et al. 2007; Cummings et al. 2008). Asymmetric antlers of the fallow deer *Duma duma* were also associated with male fighting and displaying (Alvarez 1995) and a polymorphic leg asymmetry in the dance fly *Empis jасschhoforum* was suggested to alter courtship display and male attractiveness to females (Daugeron et al. 2011). Those asymmetries are found in secondary sexual characters, which are well visible and are used in visual signalling.

*D. pachea* male genital lobes are located externally during copulation and are not intromittent organs. Nevertheless, these lobes can be considered as genital structures and as primary sexual traits by following Eberhard's (1985) broad definition of genitalia because they contact the female abdomen and stabilize the copulatory complex of female and male genitalia (Rhebergen et al. 2016). Our results thus indicate that in *D. pachea* a primary sexual trait is also used as a sexual courtship signal. To our knowledge, this is the first time that a primary sexual trait is found to be involved in pre-copulatory courtship in insects. Future work must focus on how lobe length might affect pre-copulatory courtship signalling. We did not observe direct contact of the female with male genitalia prior to the male mounting attempts at copulation start.

404 The pre-copulatory signal mediated by the left lobe could be visual or vibratory. During  
 405 courtship of *D. melanogaster* and closely related species, males perform abdomen shakes  
 406 (“quivers”) that generate substrate-borne vibratory signals (Fabre et al. 2012). Perhaps such  
 407 quivering also occurs in *D. pachea* and the frequency or amplitude of such signals could be affected  
 408 by the length of the left lobe, thus producing varying vibration signals. Whether left lobe length  
 409 affects mating via its visual impact on the female could be tested with blind females, or in the dark.  
 410 Our experiment was not suitable to test the importance of the right genital lobe length, since the  
 411 absolute variation in right lobe length was relatively low (Figure 2C). We cannot exclude that the  
 412 right lobe is also selected by the females, but our present data does not allow us to draw any  
 413 conclusion on this point.

#### 414 **Potential female benefits gained from mate-choice for males with long left lobes**

415 Total courtship durations were increased in experiments where both males courted the  
 416 female simultaneously compared to experiments with only one male courting. This indicates that  
 417 females potentially require more time to accept one of the males for copulation in cases where two  
 418 males court simultaneously. Alternatively, longer courtship durations might rely on male-male  
 419 competition causing mutual disturbances in courtship display. Since we did not find any effect of  
 420 left lobe length on male licking activity, left lobe length has probably little or no effect on male-  
 421 male competition. Otherwise, the presence or behaviour of the future copulating male would  
 422 potentially reduce courtship vigour of the non-copulating male and this would be correlated with  
 423 left lobe length. Thus, the copulation bias towards males with the longer left lobe potentially  
 424 reflects female mate-choice.

425 Female mate choice on male sexual traits was suggested to rely at least in part on the way a  
 426 sexual trait is displayed or moved (Byers et al. 2010). This implies that a certain quantity but also  
 427 accuracy of locomotor activity would matter in courtship and might better reflect overall male

quality and “truth in advertising” than a morphological character or ornament alone. Independent of left lobe length, the licking index also affected the chance of a male to engage first into copulation with the female. Left lobe length might therefore influence female mate choice through enhancing the quality of courtship signals while the licking index reflects overall male courtship vigour. Female mate choice is hypothesized to be based on direct benefits, affecting fecundity and survival of the female, but also on indirect benefits that relate to genetic quality, fecundity and survival of the progeny (Kirkpatrick and Ryan 1991; Byers et al. 2010). One possible direct benefit to mate with a male that has a long left lobe could potentially be an increased efficiency of sperm or ejaculate transfer during copulation. Males of *D. pachea* produce giant sperm and previous estimates revealed that a *D. pachea* male transmits only about  $44 \pm 6$  sperm cells per copulation (Pitnick and Markow 1994), while the maximum female sperm storage capacity in the spermathecae was estimated to be much higher and to be about 304 sperm cells (Pitnick and Markow 1994). Wild-caught *D. pachea* females were found to contain sperm from at least 3-4 males based on spermathecae filling levels (Pitnick and Markow 1994). As asymmetric lobes stabilize the genital complex (Rhebergen et al. 2016), they might have a positive effect on the amount of sperm transferred per copulation. However, we have not observed any effect of lobe length on sperm presence in the spermathecae after copulation. We note that our quantification method was not precise and that sample size was limited. Accurate direct sperm counts requires a radio-labeling methods (Pitnick and Markow 1994), which was not applicable in our experimental setup. In future approaches, improved sperm counts should be applied to test for a correlation between lobe length, female-male copulation complex stability and sperm quantity in female spermathecae. Ideally, the ejaculate quality is expected to be correlated with left lobe length, in terms of spermatozoid number and sired offspring per copulation.

Indirect paternal effects on the growth and survival of offspring could potentially play a role in *D. pachea* female mate-choice for males with long left lobes. It has been demonstrated that mate

choice based on particular male sexual characters correlates with offspring survival in diverse species (von Schantz et al. 1989; Norris 1993; Petrie 1994; Hasselquist et al. 1996; Hoikkala et al. 1998; Welch et al. 1998). However, our experiment did not allow us to test for these effects because females were sacrificed after the mating experiment and no progeny was obtained. We assessed sperm filling levels instead of the amount of female progeny because *D. pachea* females rarely lay eggs after a single insemination and about four copulations are necessary for a female to start oviposition (Pitnick 1992). To test for indirect effects, future studies should ideally use progeny males from wild caught *D. pachea* females and test if subtle lobe length variation in those males would correlate with offspring survival in single couple crosses. A similar approach was used by Hoikkala et al. (1998) (Hoikkala et al. 1998), who found that *Drosophila montana* courtship song frequency of wild caught males correlated with the survival rate of the male's progeny.

#### **Age of reproductive activities appear to be non-overlapping in sibling males and females**

The amount of sperm present in the female spermathecae after a single copulation was negatively affected by the age of the copulating male. Similarly, it was previously found that the number of progeny in single couple crosses was dependent on male adult age in *D. pachea* (Jefferson 1977). Males in *D. pachea* need about 10-14 days at 25° C after emergence to become sexually mature (Jefferson 1977; Pitnick 1992, 1993). This is related to adult testis growth and production of giant sperm (Pitnick and Markow 1994). It was shown that the relatively long time to reach male sexual maturity impacts the proportion of sexually active *D. pachea* adults (operational sex ratio), which is female-biased (Pitnick 1993). Our findings suggest that males potentially have a maximum fertility period at the beginning of their sexual maturity at approximately 13-16 days after emerging from the pupa. The detected reduction of transferred sperm mass in males older than 16 days implies an additional male reproductive limitation.

476           It was hypothesized that the delay in male sexual maturity might potentially lead to  
 477 decreased sibling mating in *D. pachea* (Pitnick 1992). Indeed, it was observed in *D. melanogaster*  
 478 that sibling matings yielded fewer progeny compared to crosses with unrelated individuals  
 479 (Jefferson 1977). In our study, the female was not a sibling of the two males. Courtship durations  
 480 were shortest in experiments with “young” virgin females, between 6 and 11 days. Given that  
 481 females reach sexual maturity at about 4 days after emerging from the pupa (Jefferson 1977; Pitnick  
 482 1993), our observation suggests that young females engage more quickly into copulation compared  
 483 to older females. It suggests that female and male peaks in reproductive abilities tend to be non-  
 484 overlapping among siblings of opposite sex and similar age. Such an effect should be relevant for  
 485 natural *D. pachea* flies if a cactus rot hosts sibling fly progeny. This is a realistic scenario, since as  
 486 single female usually lays about 25-33 eggs per day under laboratory conditions (Pitnick 1993).

487           In conclusion, we found that the chance of a male to copulate first with a female was  
 488 affected by the relative courtship activity and the left lobe length of each male. Our results indicate  
 489 that long left lobes enhance the chance of *D. pachea* males to engage into copulation, which is  
 490 expected to confer a reproductive advantage over males with short left genital lobes. Thus, the  
 491 evolution of left-right asymmetric genitalia might not only relate to its function as a stabilizing  
 492 device during copulation, but may also be used as a courtship signal in pre-copulatory mate choice.  
 493 This study represents the first example of a primary sexual trait involved in pre-copulatory  
 494 courtship in insects. The possibility that primary sexual traits may act as mating signals before  
 495 copulation has rarely been investigated in insects. Our data suggests that this phenomenon may be  
 496 more common than previously thought and may contribute to the rapid rate of genitalia evolution in  
 497 animals with internal fertilization.

## 498 **References**

- 499 Acurio, A., F. T. Rhebergen, S. E. Paulus, V. Courtier-Orgogozo, and M. Lang. 2019. Repeated  
500 evolution of asymmetric genitalia and right-sided mating behavior in the *Drosophila*  
501 *nannoptera* species group. BMC Evolutionary Biology 19:109.
- 502 Alvarez, F. 1995. Functional directional asymmetry in fallow deer (*Dama dama*) antlers. Journal of  
503 Zoology 236:563–569.
- 504 Andersson, M. 1982. Female choice selects for extreme tail length in a widowbird. Nature 299:818–  
505 820.
- 506 Arnqvist, G. 1998. Comparative evidence for the evolution of genitalia by sexual selection. Nature  
507 393:784–786.
- 508 Bateman, A. J. 1948. Intra-sexual selection in *Drosophila*. Heredity 2:349–368. Essex.
- 509 Birch, M. 1970. Pre-courtship use of abdominal brushes by the nocturnal moth, *Phlogophora*  
510 *meticulosa* (L.) (Lepidoptera: Noctuidae). Animal Behaviour 18:310–316.
- 511 Birkhead, T. R., and T. Pizzari. 2002. Postcopulatory sexual selection. Nat Rev Genet 3.
- 512 Bohme, W. 1983. The Tucano Indians of Colombia and the Iguanid Lizard *Plica plica*:  
513 Ethnological, Herpetological and Ethological Implications. Biotropica 15:148–150.
- 514 Byers, J., E. Hebets, and J. Podos. 2010. Female mate choice based upon male motor performance.  
515 Animal Behaviour 79:771–778.
- 516 Chapman, T., G. Arnqvist, J. Bangham, and L. Rowe. 2003. Sexual conflict. Trends Ecol Evol  
517 18:41–47.
- 518 Cummings, M. E., J. M. Jordão, T. W. Cronin, and R. F. Oliveira. 2008. Visual ecology of the  
519 fiddler crab, *Uca tangeri*: effects of sex, viewer and background on conspicuousness. Animal  
520 Behaviour 75:175–188.
- 521 Daugeron, C., A. Plant, I. Winkler, A. Stark, and M. Baylac. 2011. Extreme male leg polymorphic  
522 asymmetry in a new empidine dance fly (Diptera: Empididae). Biology Letters 7:11 LP – 14.
- 523 Eberhard, W. G. 1991. Copulatory Courtship and Cryptic Female Choice in Insects. Biological  
524 Reviews 66:1–31.
- 525 Eberhard, W. G. 1994. Evidence for widespread courtship during copulation in 131 species of  
526 insects and spiders, and implications for cryptic female choice. Evolution 48:711–733.
- 527 Eberhard, W. G. 2010. Evolution of genitalia: theories, evidence, and new directions. Genetica  
528 138:5–18.
- 529 Eberhard, W. G. 1985. Sexual selection and animal genitalia. Harvard University Press.

- 530 Fabre, C. C. G., B. Hedwig, G. Conduit, P. A. Lawrence, S. F. Goodwin, and J. Casal. 2012.  
531 Substrate-Borne Vibratory Communication during Courtship in *Drosophila melanogaster*.  
532 Current Biology 22:2180–2185.
- 533 Fisher, R. A. 1930. The Genetical Theory of Natural Selection. Oxford: Clarendon Press. 272 p.
- 534 Hasselquist, D., S. Bensch, and T. von Schantz. 1996. Correlation between male song repertoire,  
535 extra-pair paternity and offspring survival in the great reed warbler. Nature 381:229–232.
- 536 Heed, W. B., and H. W. Kircher. 1965. Unique Sterol in the Ecology and Nutrition of *Drosophila*  
537 *pachea*. Science 149:758–761.
- 538 Hill, G. E. 1991. Plumage coloration is a sexually selected indicator of male quality. Nature  
539 350:337–339.
- 540 Hoikkala, A., J. Aspi, and L. Suvanto. 1998. Male courtship song frequency as an indicator of male  
541 genetic quality in an insect species, *Drosophila montana*. Proceedings of the Royal Society of  
542 London. Series B: Biological Sciences 265:503–508.
- 543 Jefferson, M. 1977. Breeding biology of *Drosophila pachea* and its relatives. PhD thesis, ProQuest  
544 Dissertations Publishing.
- 545 Jordão, J. M., A. F. Curto, and R. F. Oliveira. 2007. Stereotypy and variation in the claw waving  
546 display of the fiddler crab *Uca tangeri*. acta ethologica 10:55–62.
- 547 Kahn, A. T., B. Mautz, and M. D. Jennions. 2010. Females prefer to associate with males with  
548 longer intromittent organs in mosquitofish. Biology Letters 6:55–58.
- 549 Kirkpatrick, M., and M. J. Ryan. 1991. The evolution of mating preferences and the paradox of the  
550 lek. Nature 350:33–38.
- 551 Lande, R. 1981. Models of speciation by sexual selection on polygenic traits. Proceedings of the  
552 National Academy of Sciences 78:3721–3725.
- 553 Lang, M., S. Murat, A. G. Clark, G. Gouppil, C. Blais, L. M. Matzkin, É. Guittard, T. Yoshiyama-  
554 Yanagawa, H. Kataoka, and R. Niwa. 2012. Mutations in the *neverland* gene turned  
555 *Drosophila pachea* into an obligate specialist species. Science 337:1658–1661.
- 556 Lang, M., and V. Orgogozo. 2012. Distinct copulation positions in *Drosophila pachea* males with  
557 symmetric or asymmetric external genitalia. Contributions to Zoology 81:87–94.
- 558 Lang, M., M. Polihronakis Richmond, A. E. Acurio, T. A. Markow, and V. Orgogozo. 2014.  
559 Radiation of the *Drosophila nanoptera* species group in Mexico. Journal of Evolutionary  
560 Biology 27:575–584.
- 561 Langerhans, R. B., C. A. Layman, and T. J. DeWitt. 2005. Male genital size reflects a tradeoff  
562 between attracting mates and avoiding predators in two live-bearing fish species. Proceedings  
563 of the National Academy of Sciences 102:7618–7623.
- 564 Liske, E., and W. J. Davis. 1987. Courtship and mating behaviour of the Chinese praying mantis,  
565 *Tenodera aridifolia sinensis*. Animal Behaviour 35:1524–1537.



- 566 Liske, E., and W. J. Davis. 1984. Sexual behaviour of the Chinese praying mantis. *Animal*  
567 *Behaviour* 32:916–918.
- 568 Lizée, M.-H., B. Barascud, J.-P. Cornec, and L. Sreng. 2017. Courtship and Mating Behavior of the  
569 Cockroach *Oxyhaloa deusta* [Thunberg, 1784] (Blaberidae, Oxyhaloinae): Attraction  
570 Bioassays and Morphology of the Pheromone Sources. *Journal of Insect Behavior* 30:674–694.
- 571 Møller, A., and M. Jennions. 2001. How important are direct fitness benefits of sexual selection?  
572 *Naturwissenschaften* 88:401–415.
- 573 Møller, A. P. 1988. Female choice selects for male sexual tail ornaments in the monogamous  
574 swallow. *Nature* 332:640–642.
- 575 Norris, K. 1993. Heritable variation in a plumage indicator of viability in male great tits *Parus*  
576 *major*. *Nature* 362:537–539.
- 577 Oliveira, R. F., and M. R. Custódio. 1998. Claw size, waving display and female choice in the  
578 European fiddler crab, *Uca tangeri*. *Ethology Ecology & Evolution* 10:241–251.
- 579 Perez, D. M., J. H. Christy, and P. R. Y. Backwell. n.d. Choosing a mate in a high predation  
580 environment: Female preference in the fiddler crab *Uca terpsichores*. *Ecology and Evolution*  
581 6:7443–7450.
- 582 Petrie, M. 1994. Improved growth and survival of offspring of peacocks with more elaborate trains.  
583 *Nature* 371:598–599.
- 584 Pitnick, S. 1993. Operational sex ratios and sperm limitation in populations of *Drosophila pachea*.  
585 *Behavioral Ecology and Sociobiology* 33:383–391.
- 586 Pitnick, S., and W. Heed. 1994. New Species of Cactus-Breeding *Drosophila* (Diptera:  
587 *Drosophilidae*) in the Nannoptera Species Group. *Annals of the Entomological Society of*  
588 *America* 87:307–310.
- 589 Pitnick, S., and T. A. Markow. 1994. Male gametic strategies: sperm size, testes size, and the  
590 allocation of ejaculate among successive mates by the sperm-limited fly *Drosophila pachea*  
591 and its relatives. *The American Naturalist* 143:785–819.
- 592 Pitnick, S., T. A. Markow, and G. S. Spicer. 1995. Delayed male maturity is a cost of producing  
593 large sperm in *Drosophila*. *Proceedings of the National Academy of Sciences* 92:10614–  
594 10618.
- 595 Pitnick, S., T. Markow, and G. S. Spicer. 1999. Evolution of Multiple Kinds of Female Sperm-  
596 Storage Organs in *Drosophila*. *Evolution* 53:1804–1822.
- 597 Pitnick, S. S. 1992. Sexual selection and sperm production in *Drosophila*. PhD thesis, Arizona State  
598 University, 1992.
- 599 Ploog, D. W., and P. D. MacLean. 1963. Display of penile erection in squirrel monkey (*Saimiri*  
600 *sciureus*). *Animal Behaviour* 11:32–39.



- 601 Quesnel, V. C. 1967. Observations on the reproductive behaviour of the mantis, *Acontiothespis*  
602 *multicolor*. Journal Trinidad and Tobago Field Naturalist's Club 53–56.
- 603 R Core Team. 2014. R: A language and environment for statistical computing. R Foundation for  
604 Statistical Computing, Vienna, Austria. 2013.
- 605 Rhebergen, F. T., V. Courtier-Orgogozo, J. Dumont, M. Schilthuisen, and M. Lang. 2016.  
606 *Drosophila pachea* asymmetric lobes are part of a grasping device and stabilize one-sided  
607 mating. BMC Evolutionary Biology 16:176.
- 608 Robinson, M. H. 1982. Courtship and mating behavior in spiders. Annual Review of Entomology  
609 27:1–20.
- 610 Rovner, J. S. 1967. Acoustic communication in a lycosid spider (*Lycosa rabida walckenaer*). Animal  
611 Behaviour 15:273–281.
- 612 Spieth, H. T. 1952. Mating behavior within the genus *Drosophila* (Diptera). Bull Am Museum Nat  
613 Hist 99.
- 614 Sreng, L. 1993. Cockroach mating behaviors, sex pheromones, and abdominal glands (Dictyoptera:  
615 Blaberidae). Journal of Insect Behavior 6:715–735.
- 616 Thornhill, R. 1983. Cryptic Female Choice and Its Implications in the Scorpionfly *Harpobittacus*  
617 *nigriceps*. The American Naturalist 122:765–788.
- 618 Vilela, C. R., and G. Bächli. 1990. Taxonomic studies on Neotropical species of seven genera of  
619 *Drosophilidae* (Diptera). Mitteilungen der Schweizerischen Entomol Gesellschaft 63.
- 620 von Schantz, T., G. Göransson, G. Andersson, I. Fröberg, M. Grahn, A. Helgée, and H. Wittzell.  
621 1989. Female choice selects for a viability-based male trait in pheasants. Nature 337:166–169.
- 622 Warren, J. T., J. Wismar, B. Subrahmanyam, and L. I. Gilbert. 2001. Woc (without children) gene  
623 control of ecdysone biosynthesis in *Drosophila melanogaster*. Molecular and cellular  
624 endocrinology 181:1–14.
- 625 Welch, A. M., R. D. Semlitsch, and H. C. Gerhardt. 1998. Call Duration as an Indicator of Genetic  
626 Quality in Male Gray Tree Frogs. Science 280:1928 LP – 1930.
- 627 Wickler, W. 1966. Ursprung und biologische Deutung des Genitalprasentierens männlicher  
628 Primaten. Zeitschrift für Tierpsychologie 23:422–437.

## 629 Author Contributions

630 ML and BL designed the experiments. BL and DC recorded fly copulation and performed  
631 light microscopy analysis of *Drosophila* male genitalia. BL and ML analysed the data. ML, VCO  
632 and BL wrote the manuscript. All authors have read and approved the manuscript.

## 633 Acknowledgements

634 We thank Therese A. Markow for discussions. We are grateful to Alexandre Peluffo for help  
635 with the statistical analysis, Claus Lang for technical support and Juliette Royer for dissections of  
636 *D. pachea* male genitalia. This study was supported by the CNRS and by a grant of the European  
637 Research Council under the European Community's Seventh Framework Program (FP7/2007-2013  
638 Grant Agreement no. 337579) given to VCO. BL was supported by a pre-doctoral fellowship  
639 Sorbonne Paris Cité of the Université Paris 7 Denis Diderot.

## 640 Supporting Information

641 **Additional datafile 1:** Supplementary Figures and Tables, **Figure S1:** Camera device for movie  
642 recording, **Figure S2:** Pairwise lobe length differences of males used in the competition mating  
643 experiments, **Figure S3:** Courtship and copulation duration in competition mating experiments  
644 **Figure S4:** Courtship duration increases with female age, **Table S1:** Mate competition experiments  
645 used for courtship analysis.

646 **Additional datafile 2:** Measurements of mating behaviour, genital lobe lengths and spermathecae  
647 filling levels of individuals used in the competition mating experiments.

648 **Additional datafile 3:** Raw measurements of lobe lengths in different *D. pachea* stocks

649 **Additional datafile 4:** Dataset for licking index analysis.

## 650 Tables

651 **Table 1: lobe lengths in *D. pachea* stocks.** <sup>†</sup>Confidence interval

| stock           | left lobe [μm], median (95% CI <sup>†</sup> ) | right lobe [μm] median, (95% CI <sup>†</sup> ) | n  |
|-----------------|-----------------------------------------------|------------------------------------------------|----|
| 15090-1698.01   | 206.7 (196.83-215.33)                         | 147.6 (145.42-153.09)                          | 50 |
| 15090-1698.02   | 207.9 (191.97-210.47)                         | 145.0 (139.87-147.54)                          | 50 |
| selection stock | 186.1 (171.26-184.41)                         | 142.2 (137.91-143.36)                          | 99 |

652 **Table 2: Effects of lobe length and courtship behaviour on male copulation success.** N  
653 Experiment: number of experiments, N licking index: number of experiments where the licking index was  
654 calculated. †GLM model: male copulation ~ licking index, ‡GLM model: male copulation ~ left lobe length +  
655 right lobe length; ANOVA,  $\chi^2$ : deviance / null residual)

| Experiment                                    | N<br>Experiment / N<br>licking<br>Index | Copulating males [%]<br>(binomial test: equal proportions) |  | Effect on copulation success,<br>logistic regression |                                               |                                   |
|-----------------------------------------------|-----------------------------------------|------------------------------------------------------------|--|------------------------------------------------------|-----------------------------------------------|-----------------------------------|
|                                               |                                         | larger left lobe length                                    |  | licking index†                                       | left lobe length‡                             | right lobe length‡                |
| all experiments with<br>unmodified males      | 111/104                                 | 64.87<br><b>P = 0.00224</b>                                |  | $X^2 = 22.46/288.35$<br><b>P = 0.000002151</b>       | $X^2 = 15.71/415.83$<br><b>P = 0.00007395</b> | $X^2 = 0.07/415.83$<br>P = 0.7878 |
| Females 15090-<br>1698.01<br>unmodified males | 51/47                                   | 68.63<br><b>P = 0.01097</b>                                |  | $X^2 = 14.22/130.31$<br><b>P = 0.0001631</b>         | $X^2 = 9.54/209.32$<br><b>P = 0.00201</b>     | $X^2 = 0.01/209.32$<br>P = 0.9247 |
| Females 15090-<br>1698.02<br>unmodified males | 60/57                                   | 61.67<br>P = 0.09246                                       |  | $X^2 = 9.60/158.04$<br><b>P = 0.001949</b>           | $X^2 = 6.59/206.5$<br><b>P = 0.01026</b>      | $X^2 = 0.24/206.5$<br>P = 0.62693 |
| Females 15090-<br>1698.01<br>left lobe cut    | 54/---                                  | 57.41<br>P = 0.34090                                       |  | ---                                                  | $X^2 = 5.72/169.13$<br><b>P = 0.01673</b>     | $X^2 = 0.03/169.13$<br>P = 0.8387 |

656 **Table 3: Courtship duration, courtship index and copulation duration in experiments where**  
657 **both males courted the female**

| female            | male               | n  | total courtship duration<br>[min] |            | sum licking duration<br>[min] |            | No. licking<br>periods |       | Courtship Index |            | copulation duration [min] |             |
|-------------------|--------------------|----|-----------------------------------|------------|-------------------------------|------------|------------------------|-------|-----------------|------------|---------------------------|-------------|
|                   |                    |    | median                            | range      | median                        | range      | median                 | range | median          | range      | median                    | range       |
| 15090-<br>1698.01 | non-<br>copulating | 47 | 3.23                              | 0.3-33.8   | 0.63                          | 0.02-7.68  | 4                      | 1-22  | 0.23            | 0.016-0.60 | ---                       | ---         |
|                   | copulating         | 47 |                                   |            | 1.00                          | 0.10-12.53 | 3                      | 1-29  | 0.40            | 0.014-1.00 | 32.84                     | 10.13-49.21 |
| 15090-<br>1698.02 | non-<br>copulating | 57 | 6.3                               | 0.74-23.10 | 1.58                          | 0.04-14.24 | 5                      | 1-36  | 0.37            | 0.017-0.84 | ---                       | ---         |
|                   | copulating         | 57 |                                   |            | 2.80                          | 0.14-14.58 | 5                      | 1-35  | 0.45            | 0.038-0.96 | 27.7                      | 2.72-50.21  |

658 **Table 4: Effects of lobe length, sum licking duration, copulation duration and age on**  
659 **spermathecae filling levels.** †GLM model, spermatheca filling level ~ predictor variable,  
660 gaussian(link=identity), t-test

| N  | Effect on approximate spermathecae sperm filling level † |                              |                              |                              |                              |                                                                  |
|----|----------------------------------------------------------|------------------------------|------------------------------|------------------------------|------------------------------|------------------------------------------------------------------|
|    | left lobe length                                         | right lobe length            | sum licking duration         | copulation duration          | female age                   | male age                                                         |
| 79 | $t_1 = 0.0256$<br>P = 0.8732                             | $t_1 = 2.2775$<br>P = 0.1354 | $t_1 = 0.4541$<br>P = 0.5038 | $t_1 = 2.3555$<br>P = 0.1289 | $t_1 = 1.3021$<br>P = 0.2574 | <b><math>F_{1,77} = 32.029</math></b><br><b>P = 0.0000002486</b> |

## 661 **Figure Legends**

662 **Figure 1: *Drosophila pachea* male genital lobes.** (A) Male of stock 15090-1698.02 in ventral view  
663 and with asymmetric lobes. (B) Male of the selection stock with apparently symmetric lobes. The  
664 scale bars correspond to 200  $\mu$ m. (C) Posterior view of a dissected male terminalia of stock 15090-  
665 1698.02 with asymmetric lobes. (D) Posterior view of a dissected male terminalia of the selection  
666 stock; the scale bars correspond to 100  $\mu$ m, dots indicate lobe length measurement points.

667 **Figure 2: Genital lobe lengths differ between *D. pachea* stocks.** Lengths of the left and right  
668 epandrial lobe lobes are presented for (A) stock 15090-1698.01, (B) stock 15090-1698.02, and (C)  
669 the selection stock. Sibling males of those used in the mating experiment are shown in panel (C).  
670 Each point represents one male. The variance of left lobe length is increased in the selection stock  
671 compared to the source stock 15090-1698.02 (Levene's test: selection stock / 15090-1698.02:  
672  $df_1=1$ ,  $df_2=147$ ,  $F=11.506$ ,  $p=0.0008913$ ), while the variance of the right lobe length were not  
673 significantly different (Levene's test,  $df_1=2$ ,  $df_2=196$ ,  $F=0.8684$ ,  $p=0.4212$ ).

674 **Figure 3: Courtship durations and relative courtship activity.** (A) The total courtship duration  
675 was shorter in experiments with only one male displaying courtship signs (one, white box-plots)  
676 compared to experiments with both males courting simultaneously (both, grey box-plots) (Mann-  
677 Whitney-Wilcoxon tests, female stock 15090-1698.01,  $W=385$ ,  $N=25/51$ ,  $P=0.0053$ ; females of  
678 stock 15090-1698.02,  $W=219$ ,  $N=16/60$ ,  $P=0.0009$ ). (B) The licking index (ratio of total licking  
679 duration of a single male over total courtship duration of both males) of the copulating male (cop,  
680 grey box-plots) was higher than the licking index of the non-copulating male (non-cop, white box-  
681 plots) (GLM logistic regression licking index  $\sim$  copulation success, females of both stocks,  $z_1 =$   
682  $4.282$ ,  $P=0.0000185$ ; ANOVA,  $\chi^2_{1,206}$  Deviance =  $21.02/282.73$ ,  $P=0.000004538$ ). Explain what is  
683 the horizontal black bar (median?), the box, the xx. Each point represents one mating experiment in  
684 (A) and one male in (B).



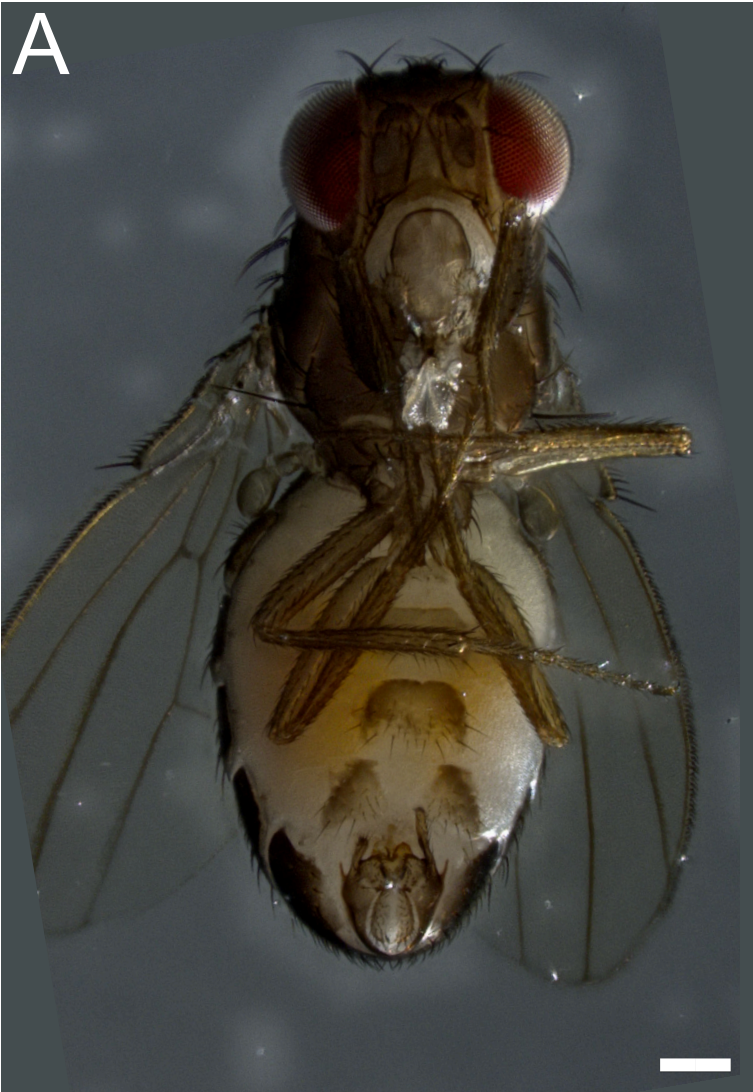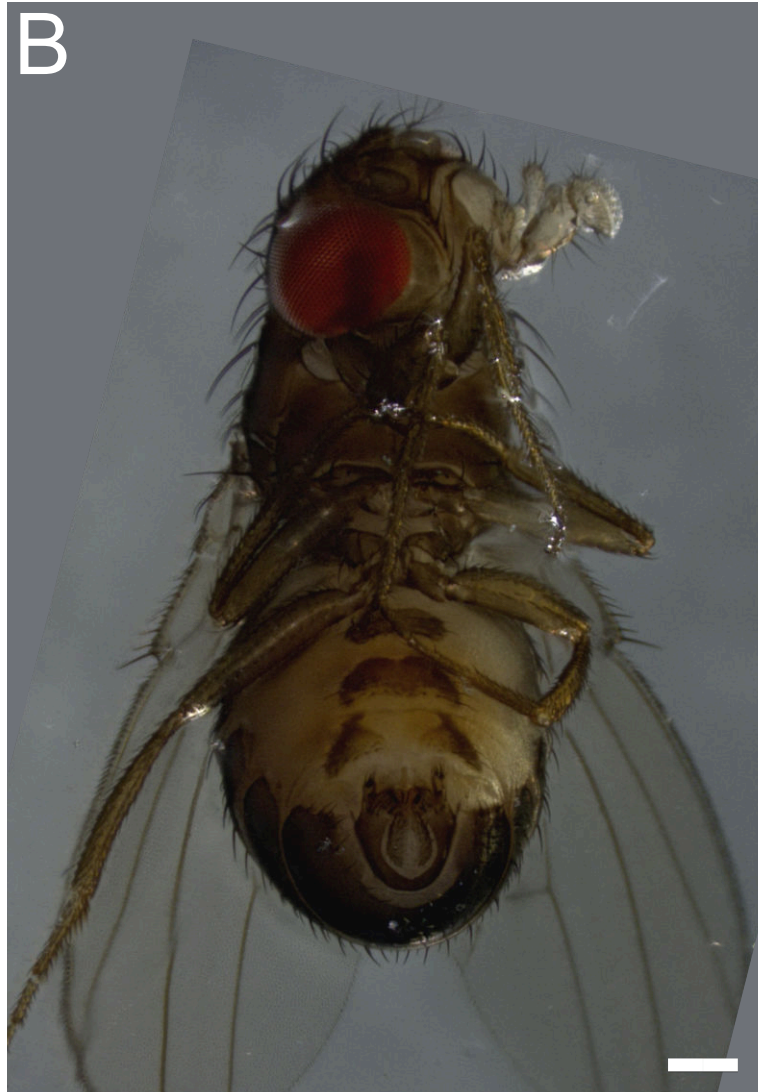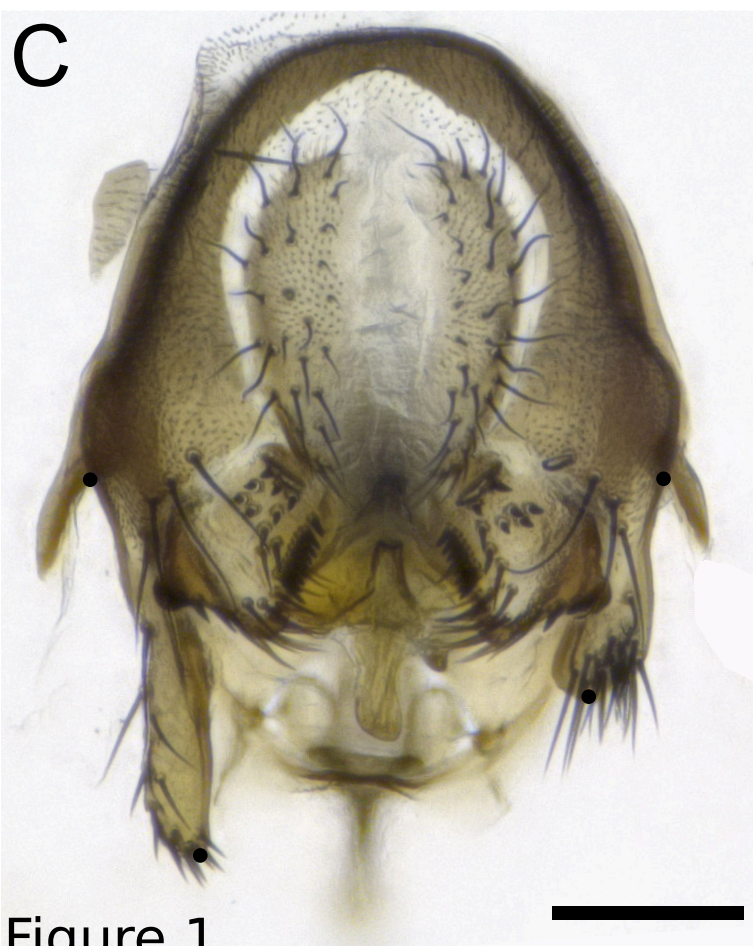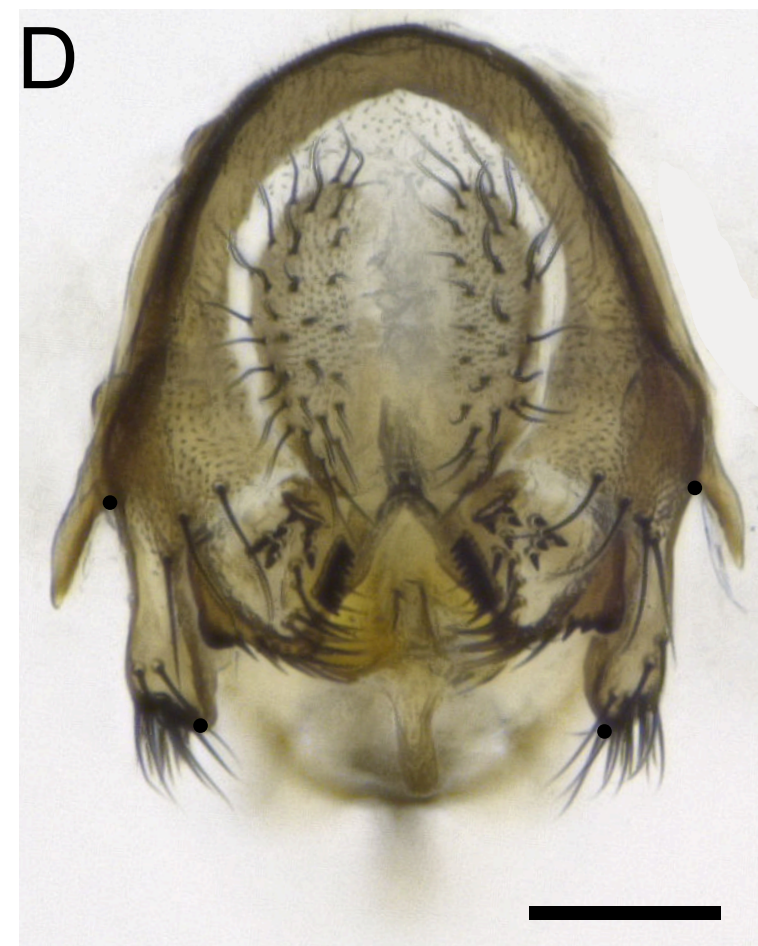

Figure 1

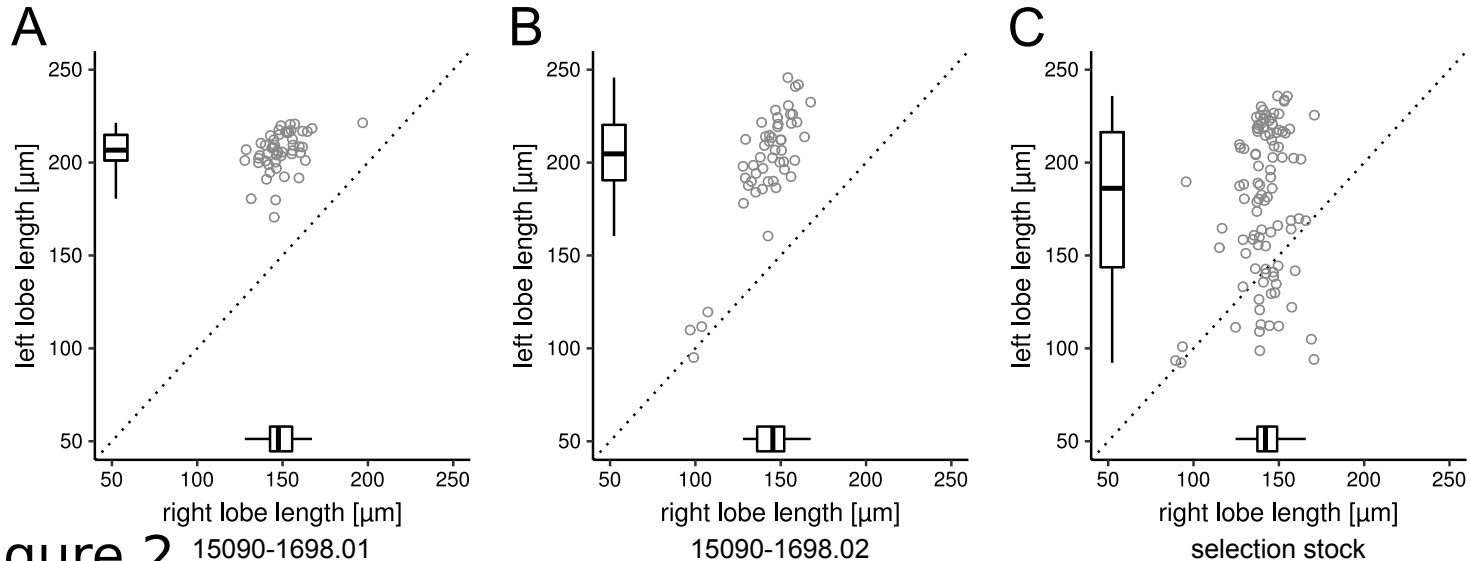

**Figure 2**

**A**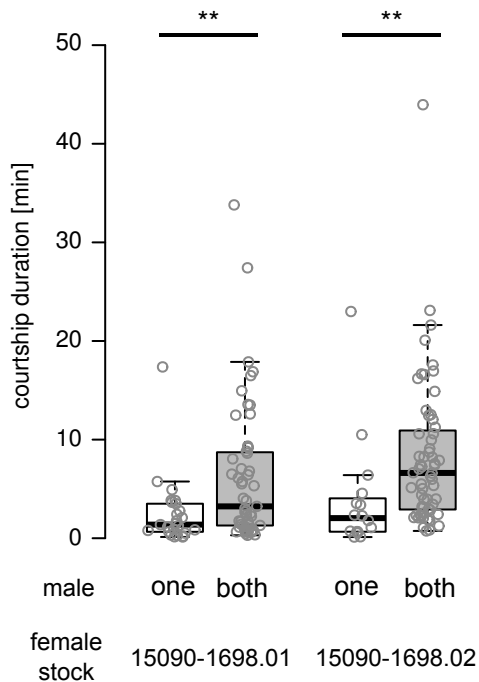**B**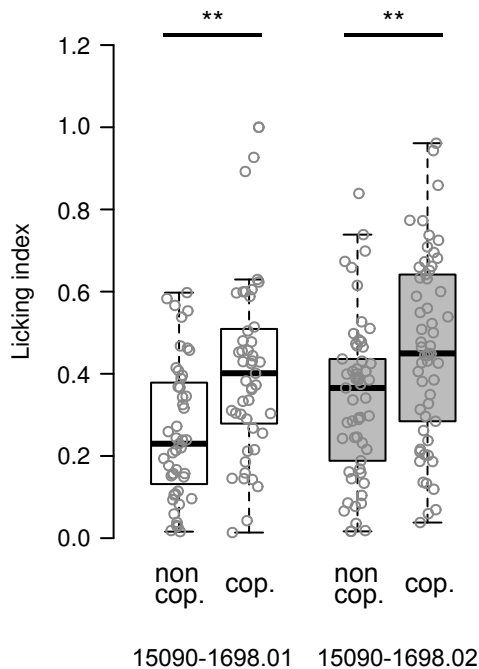**Figure 3**
